# Supplementary material for: Kinetics of Physiological Responses as a Measure of Intensity and Hydration Status During Experimental Physical Stress in Human Volunteers
Source: PubMed Central journal article supplement (PMC7498705; doi:10.3389/fphys.2020.01006), 2020-09-04
Supplement: Table_2.pdf [file Table_2.pdf]

## *Supplementary Material*

**Supplement 2. The abbreviations with the corresponding full names of the 34 parameters which are listed in the heatmap (Figure 3).**

| <b>Nr</b> | <b>Abbreviation parameter</b> | <b>Full name parameter</b>            |
|-----------|-------------------------------|---------------------------------------|
| 1         | lymph                         | lymphocytes                           |
| 2         | citru                         | citrulline                            |
| 3         | bicar                         | bicarbonate                           |
| 4         | tyr                           | tyrosine                              |
| 5         | ala                           | alanine                               |
| 6         | pota                          | potassium                             |
| 7         | neut                          | neutrophils                           |
| 8         | cort                          | cortisol                              |
| 9         | creat                         | creatinine                            |
| 10        | hb                            | hemoglobin                            |
| 11        | ht                            | hematocrite                           |
| 12        | eryt                          | erythrocytes                          |
| 13        | ifabp                         | intestinal fatty acid binding protein |
| 14        | mono                          | monocytes                             |
| 15        | phe                           | phenylalanine                         |
| 16        | albu                          | albumine                              |
| 17        | trp                           | tryptophan                            |
| 18        | chlo                          | chloride                              |
| 19        | sodi                          | sodium                                |
| 20        | tau                           | taurine                               |
| 21        | thr                           | threonine                             |
| 22        | gln                           | glutamine                             |
| 23        | asn                           | asparagine                            |
| 24        | leu                           | leucine                               |
| 25        | ser                           | serine                                |
| 26        | arg                           | arginine                              |
| 27        | ile                           | isoleucine                            |
| 28        | val                           | valine                                |
| 29        | urea                          | urea                                  |
| 30        | glu                           | glutamic acid                         |
| 31        | lys                           | lysine                                |
| 32        | gly                           | glycine                               |
| 33        | asp                           | asparic acid                          |
| 34        | meth                          | methionine                            |
